# Supplementary material
Source: PubMed Central journal article supplement (PMC5871235)
Supplement: NIHMS948929-supplement-Supplementary_Material.pdf [file NIHMS948929-supplement-Supplementary_Material.pdf]

## Online Methods

### SUPPLEMENTARY METHODS

#### The KORA S4 and MONICA/KORA S2 studies

Primary discovery took place in the Multinational Monitoring of Trends and Determinants in Cardiovascular Diseases (MONICA) / Cooperative Health Research in the Region of Augsburg (KORA) surveys, [1 2] specifically the KORA S4 and MONICA/KORA S2 surveys.

The baseline KORA survey 4 (S4) consists of 4,261 individuals (aged 25-74 years) examined between 1999 and 2001.[3] Metabolite profiling was performed on 1,610 individuals (1,545 without prior MI) aged 55 to 74 years who provided serum samples at the baseline examination. For the discovery cohort 203 individuals were removed due to their non-fasting status. This left 1,342 participants for the study of which 67 had an incident MI with seven years of average follow-up time (follow up conducted through 2009).

MONICA/KORA S2 is a survey of 4,940 participants who were all enrolled from 1989-1990.[4] A case-cohort study was formed from them by taking all incident MI cases identified before 2003 (N = 112) and combining it with a sex stratified cohort of randomly selected participants free of prevalent MI at baseline (N = 549). Only incident cases that occurred before the age of 75 were included.

Two definitions of MI were used over the time period spanning the MONICA/KORA S2 and KORA S4 cohort. These MI definitions are complimentary and represent the best practices at the time of diagnosis. Until December 2000, the diagnosis of a major non-fatal MI event was based on the MONICA algorithm taking into account symptoms, cardiac enzymes and ECG changes. Since January 1, 2001, MIs are diagnosed by the European

Society of Cardiology and American College of Cardiology criteria. Deaths from MI were validated by autopsy reports, death certificates, chart reviews, and information from the last treating physician.[5]

In MONICA/KORA S2, hsCRP concentrations were measured using a high-sensitivity immunoradiometric assay (IRMA) (men aged 45–74 years) [6] or a high-sensitivity latex enhanced nephelometric assay on a BN II analyzer (men aged 35–44 years and all women) (Dade- Behring, Marburg, Germany). [7] Both methods gave similar results when the same samples were analyzed. [8] In KORA S4, hsCRP concentrations were assessed by a high sensitivity latex enhanced nephelometric assay on a BN II analyser (Dade Behring, Marburg, Germany).[7] The intra- and interassay coefficients of variation of quality control test sera for CRP were as follows: 1) CRP-IRMA, 4.0% and 12.0%; 2) CRP nephelometric assay, <5% and <10%, respectively.

### **The AGES and REFINE Reykjavik studies**

For biomarker association refinement in an independent cohort we utilized the Age, Gene/Environment Susceptibility (AGES) Reykjavik and the Risk Evaluation For INfarct Estimates (REFINE) studies, two population-based cohort studies conducted in Iceland in the past decade.[9] The AGES Reykjavik (aged 66-96 years, mean age  $75\pm 6$ , 58% females) is a study of all survivors of the 40-year-long prospective Reykjavik study ( $n=30,000$ ), an epidemiologic study focusing on four biologic systems: vascular, neurocognitive (including sensory), musculoskeletal, and body composition/metabolism.[10] The REFINE Reykjavik study (20-73, mean age  $49\pm 12$ , 56% females) was designed with the aim of increasing the predictability of risk factors for the development of CAD on an individual basis in relatively young people, using comprehensive evaluation of the arterial condition. AGES and REFINE

subjects have participated in follow-up studies (4-5 years from baseline). For the present study we selected controls that had no history of CHD including MI, PCI, CABG (from hospital records or self report) at entry, and incident MI cases that were diagnosed within 6 years after entering the study. Further, we selected an age and sex matched case-control cohort of 37 incident MI cases and 74 healthy MI-free controls at mean age of 57 (range 36-72 years) from REFINE, and 50 incident MI cases and 100 MI-free controls at mean age of 71 (range 68-74 years) from the AGES study.

For both AGES and REFINE, hsCRP was measured on a Hitachi 912, using reagents from Roche Diagnostics (Mannheim, Germany). The coefficient of variation of the method was 1.3% for intra-assay and 3.4% for inter-assay through the period of data collection.

### **Metabolite measurements**

For the KORA S4 and MONICA S2 surveys, 188 metabolites have been simultaneously quantified out of 10  $\mu$ L serum using the Absolute*IDQ*<sup>TM</sup> P180 kit (BIOCRATES Life Science AG, Innsbruck, Austria). Liquid handling of serum samples was performed with Hamilton star robot (Hamilton Bonaduz AG, Bonaduz, Switzerland). Samples were measured by LC-MS/MS and FIA-MS/MS (liquid chromatography-/flow injection analysis-tandem mass spectrometry). Details of the measurement methods and explanations for abbreviations were described in previous publications.[11-14] The complete analytical process was monitored by quality control steps, reference samples and the Met*IDQ*<sup>TM</sup> software package, which is an integral part of the Absolute *IDQ*<sup>TM</sup> kit.

For the AGES and REFINE Reykjavik studies metabolites were quantified using the Biocrates Absolute*IDQ*<sup>TM</sup> P150 kit which assayed 163 metabolites.[15-17] The quality control procedure was the same as that used for the KORA S4 and S2 surveys.[11]

### **Statistical Methods**

Cox regression models were used to model the association between metabolites and MI for KORA S4 and KORA S2. For the KORA S2 cohort a sex-stratified weighting was used to account for over-sampling of cases in the case-cohort design. This weighting follows Breslow's method,[5] and is also suggested to be proper for a stratified case-cohort design, which is used in the KORA S2 study. For the AGES and REFINE Reykjavik studies conditional logistic regression models were used to analyze the case-control samples.

The 140 metabolites from the KORA S4 cohort went through several filtering steps to arrive at a final list of potential biomarkers (Online Figure S2). The first step was to associate each metabolite with MI via Cox regression in KORA S4 to determine those metabolites showing nominal ( $P < 0.05$ ) associations. Two Cox regression models were used to evaluate the independence of the metabolites from clinical factors associated with MI

1. Basic model adjusting for age and sex,
2. Multivariable model adjusting for body mass index (BMI), smoking status, alcohol consumption, diabetes, systolic blood pressure, high density lipoprotein cholesterol (HDL-C), and total cholesterol

In the next step in the procedure, metabolites with non-zero regression estimates after L1-regularized (lasso) regression on all metabolites in KORA S4 were retained. Those metabolites that remained after the regression were filtered via backward stepwise regression.

The backward stepwise selection was guided by the Akaike Information Criterion. The metabolites remaining after this step were referred to as the potential biomarkers.

We used a case-cohort study sampled from the KORA S2 cohort and a nested case-control study within the AGES and REFINE Reykjavik studies to replicate and validate any improved prediction seen from the potential biomarkers and thus be able to label them as metabolite biomarkers in the event that their predictive value replicated. In the KORA S2 case-cohort we used a sex-stratified weighting in our Cox regression models to account for the over-sampling of cases in the case-cohort design.[5] Conditional logistic regression models were used to analyze the matched case-control samples from the AGES and REFINE Reykjavik studies. Sensitivity analyses were performed to evaluate the influence of potential confounders on significant results.

The metabolite biomarkers were those potential biomarkers whose improved MI risk prediction relative to the Framingham risk score (FRS) replicated in the independent cohorts. Receiver operating characteristic (ROC) curves were used to compare the MI risk. Added predictive values of our biomarkers for incident MI were indicated by the increase in the area under the ROC curves (AUC), net reclassification improvement (NRI) and integrated discrimination improvement (IDI) statistics, which were assessed in all models and compared with the FRS.[18] All estimates of the incremental predictive values were based on leave-one-out cross-validation. We use the term novel biomarkers to describe those candidate biomarkers that showed improvements in prediction performance with respect to incident MI.

To understand the impact of the metabolite biomarkers on inflammation we used linear regression to associate the metabolites with hsCRP in KORA and the AGES and REFINE Reykjavik studies. The  $\beta$  estimations were calculated as the change in log-transformed hsCRP level for each standard deviation (SD) increase of the log-transformed

metabolite concentration after adjustment for MI risk factors. Associations were defined as significant at the  $P < 0.05$  cutoff. All statistical analyses were performed in R (version 3.0.1, <http://cran.r-project.org/>), using the packages penalized,[19] pROC,[20] and PredictABEL.[21]

### Sensitivity analysis

As KORA S2 was non-fasting we tested the influence of fasting status on the metabolite biomarkers by including 203 non-fasting samples (22 MI cases and 181 non-cases) in the Cox regression analyses for the KORA S4 cohort. In addition, we tested whether the association of the replicated biomarkers with incident MI was confounded by statins or modified within subgroups of the populations assessed.

### References

1. Wichmann HE, Gieger C, Illig T, Group MKS. KORA-gen--resource for population genetics, controls and a broad spectrum of disease phenotypes. *Gesundheitswesen* 2005;**67 Suppl 1**:S26-30 doi: 10.1055/s-2005-858226[published Online First: Epub Date].
2. Holle R, Happich M, Lowel H, Wichmann HE, Group MKS. KORA--a research platform for population based health research. *Gesundheitswesen* 2005;**67 Suppl 1**:S19-25 doi: 10.1055/s-2005-858235[published Online First: Epub Date].
3. Keil U, Liese AD, Hense HW, et al. Classical risk factors and their impact on incident non-fatal and fatal myocardial infarction and all-cause mortality in southern Germany. Results from the MONICA Augsburg cohort study 1984-1992. *Monitoring Trends and Determinants in Cardiovascular Diseases. European heart journal* 1998;**19**(8):1197-207
4. Koenig W, Khuseyinova N, Baumert J, Meisinger C. Prospective study of high-sensitivity C-reactive protein as a determinant of mortality: results from the MONICA/KORA Augsburg Cohort Study, 1984-1998. *Clinical chemistry* 2008;**54**(2):335-42 doi: 10.1373/clinchem.2007.100271[published Online First: Epub Date].
5. Barlow WE, Ichikawa L, Rosner D, Izumi S. Analysis of case-cohort designs. *Journal of clinical epidemiology* 1999;**52**(12):1165-72
6. Hutchinson WL, Koenig W, Frohlich M, Sund M, Lowe GD, Pepys MB. Immunoradiometric assay of circulating C-reactive protein: age-related values in the adult general population. *Clinical chemistry* 2000;**46**(7):934-8

7. Rifai N, Tracy RP, Ridker PM. Clinical efficacy of an automated high-sensitivity C-reactive protein assay. *Clinical chemistry* 1999;**45**(12):2136-41
8. Khuseyinova N, Imhof A, Trischler G, et al. Determination of C-reactive protein: comparison of three high-sensitivity immunoassays. *Clinical chemistry* 2003;**49**(10):1691-5
9. Harris TB, Launer LJ, Eiriksdottir G, et al. Age, Gene/Environment Susceptibility-Reykjavik Study: multidisciplinary applied phenomics. *American journal of epidemiology* 2007;**165**(9):1076-87 doi: 10.1093/aje/kwk115[published Online First: Epub Date]].
10. Harris TB, Launer LJ, Eiriksdottir G, et al. Age, Gene/Environment Susceptibility-Reykjavik Study: multidisciplinary applied phenomics. *Am J Epidemiol.* 2007;**165**(9):1076-87.
11. Wang-Sattler R, Yu Z, Herder C, et al. Novel biomarkers for pre-diabetes identified by metabolomics. *Molecular systems biology* 2012;**8**:615 doi: 10.1038/msb.2012.43[published Online First: Epub Date]].
12. Xu T, Holzapfel C, Dong X, et al. Effects of smoking and smoking cessation on human serum metabolite profile: results from the KORA cohort study. *BMC medicine* 2013;**11**:60 doi: 10.1186/1741-7015-11-60[published Online First: Epub Date]].
13. Goek ON, Prehn C, Sekula P, et al. Metabolites associate with kidney function decline and incident chronic kidney disease in the general population. *Nephrology, dialysis, transplantation : official publication of the European Dialysis and Transplant Association - European Renal Association* 2013;**28**(8):2131-8 doi: 10.1093/ndt/gft217[published Online First: Epub Date]].
14. Zukunft S, Sorgenfrei M, Prehn C, Möller G, Adamski J. Targeted Metabolomics of Dried Blood Spot Extracts. *Chromatographia* 2013;**10**
15. Römisch-Margl W, Prehn C, Bogumil R, Roehring C, Suhre K, J. A. Procedure for tissue sample preparation and metabolite extraction for high-throughput targeted metabolomics. *Metabolomics* 2012
16. Illig T, Gieger C, Zhai G, et al. A genome-wide perspective of genetic variation in human metabolism. *Nat Genet* 2010;**42**(2):137-41 doi: ng.507 [pii] 10.1038/ng.507[published Online First: Epub Date]].
17. Yu Z, Zhai G, Singmann P, et al. Human serum metabolic profiles are age dependent. *Aging cell* 2012;**11**(6):960-7 doi: 10.1111/j.1474-9726.2012.00865.x[published Online First: Epub Date]].
18. D'Agostino RB, Sr., Vasan RS, Pencina MJ, et al. General cardiovascular risk profile for use in primary care: the Framingham Heart Study. *Circulation* 2008;**117**(6):743-53 doi: 10.1161/CIRCULATIONAHA.107.699579[published Online First: Epub Date]].
19. Goeman JJ. L1 penalized estimation in the Cox proportional hazards model. *Biometrical journal. Biometrische Zeitschrift* 2010;**52**(1):70-84 doi: 10.1002/bimj.200900028[published Online First: Epub Date]].
20. Robin X, Turck N, Hainard A, et al. pROC: an open-source package for R and S+ to analyze and compare ROC curves. *BMC bioinformatics* 2011;**12**:77 doi: 10.1186/1471-2105-12-77[published Online First: Epub Date]].
21. Kundu S, Aulchenko YS, van Duijn CM, Janssens AC. PredictABEL: an R package for the assessment of risk prediction models. *European journal of epidemiology* 2011;**26**(4):261-4 doi: 10.1007/s10654-011-9567-4[published Online First: Epub Date]].

## Supplementary Figures

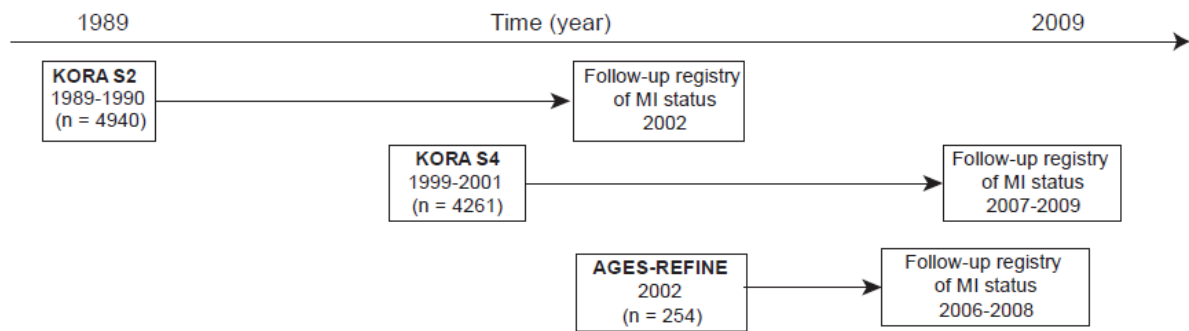

**Figure S1. The timeline of the three cohorts**



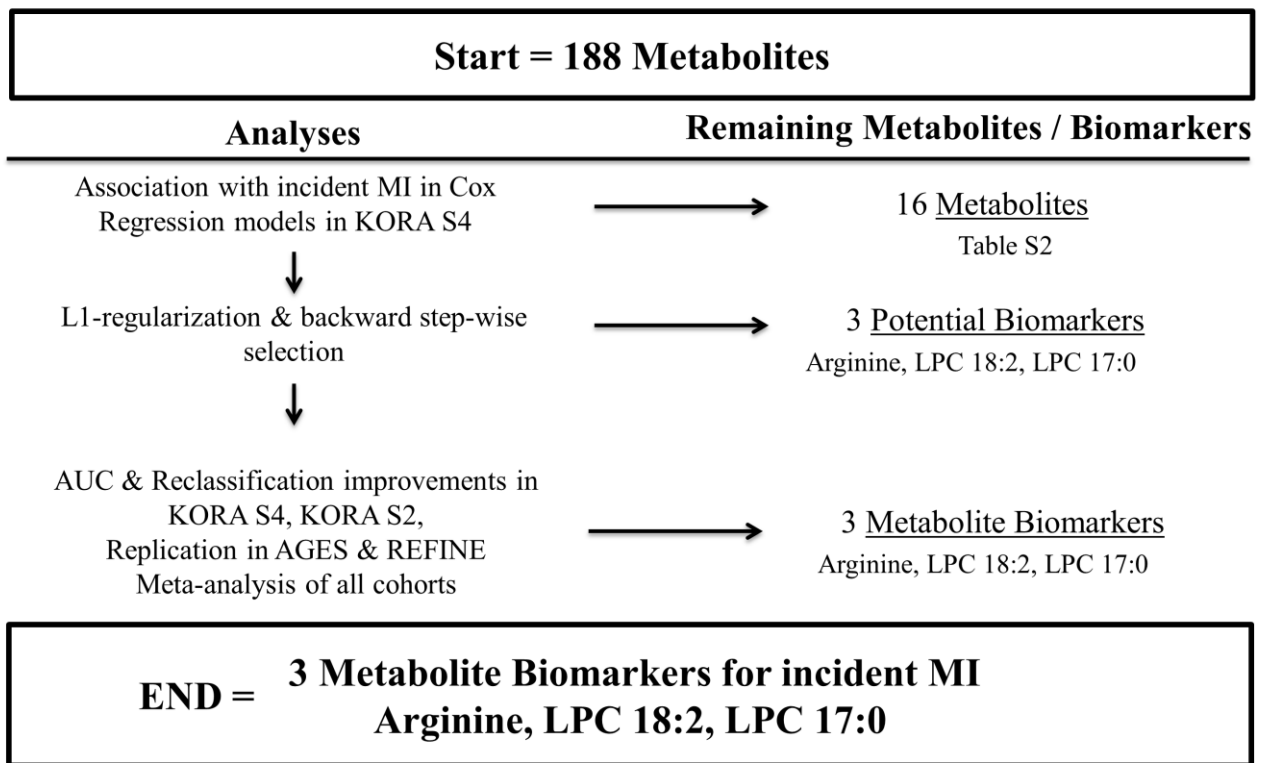

**Figure S2. Procedures for the selection and validation of the candidate biomarkers**

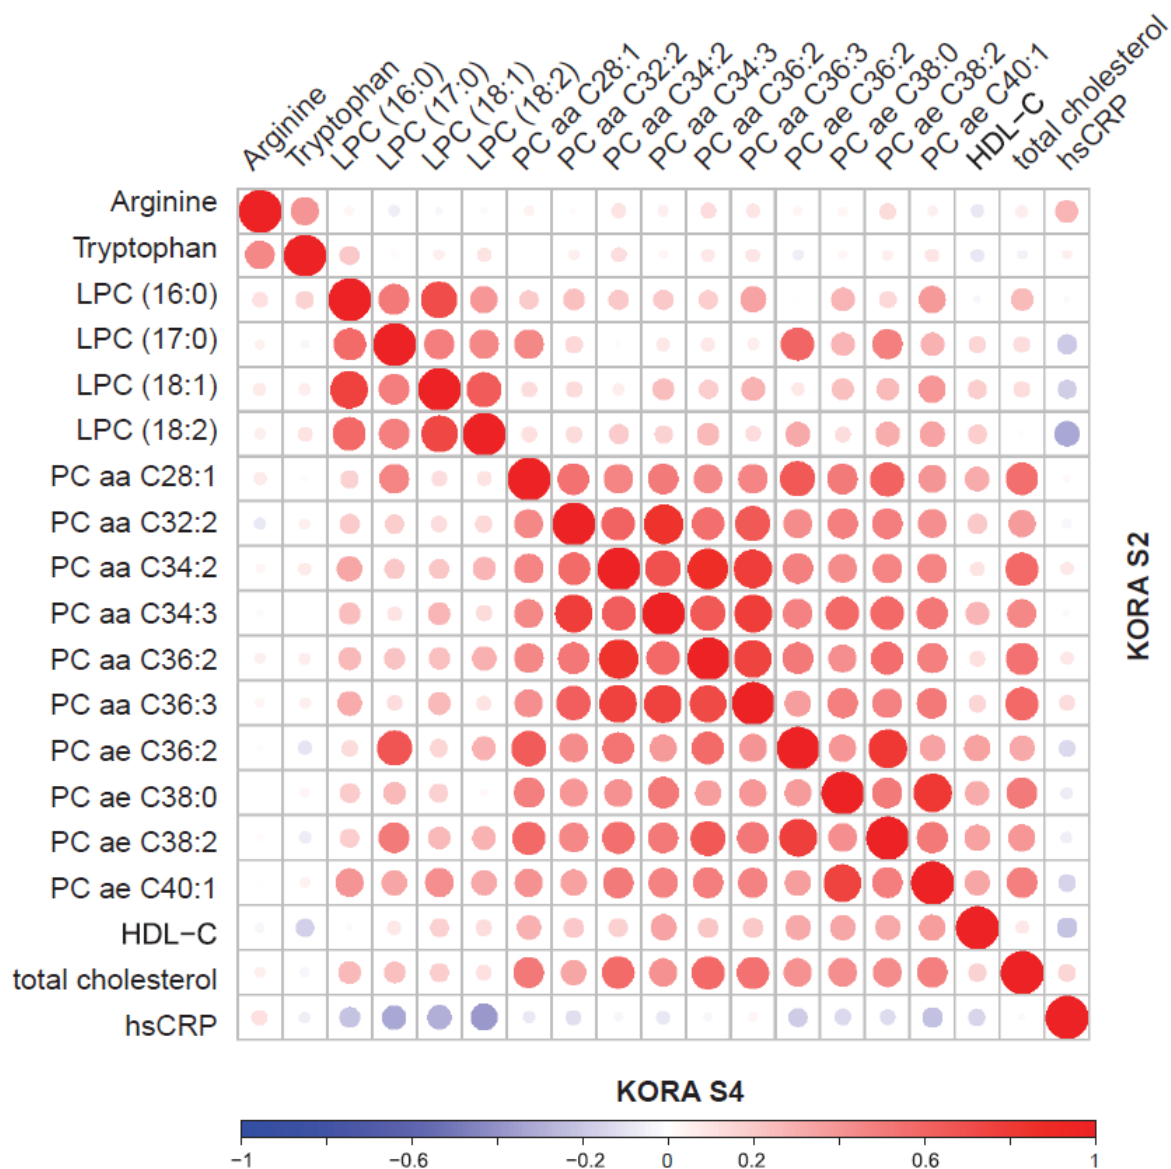

**Figure S3. Correlations between metabolites and CVD risk factors in KORA S4 and KORA S2**

The Spearman correlation coefficients for each pair of metabolites and CVD risk factors were calculated in KORA S4 (lower triangle) and KORA S2 (upper triangle). The strength of correlations is indicated by colour as shown in the figure legend.

## Supplementary Tables

**Table S1. Metabolite panels of KORA S4 and KORA S2 case-cohort**

| Biochemical name          | KORA S4 |               |               |             | KORA S2 |               |               |             |
|---------------------------|---------|---------------|---------------|-------------|---------|---------------|---------------|-------------|
|                           | CV (%)  | Above LOD (%) | Concentration | Application | CV (%)  | Above LOD (%) | Concentration | Application |
| Carnitine                 | 5.8     | 99.63         | 41.25 ± 8.99  | Used        | 9.41    | 100.00        | 43.74±9.66    | Used        |
| Acetylcarnitine           | 6.3     | 99.63         | 8.64 ± 2.91   | Used        | 5.83    | 100.00        | 7.36±2.81     | Used        |
| Propionylcarnitine        | 10      | 99.63         | 0.48 ± 0.15   | Used        | 7.49    | 100.00        | 0.51±0.2      | Used        |
| Propenoylcarnitine        | 32.8    | 3.72          | 0.01 ± 0      | Excluded    | 24.63   | 6.20          | 0.02±0        | Excluded    |
| Hydroxypropionylcarnitine | 44.7    | 2.85          | 0.12 ± 0.1    | Excluded    | 63.57   | 0.00          | 0.08±0.05     | Excluded    |
| Butyrylcarnitine          | 9.7     | 99.63         | 0.23 ± 0.13   | Used        | 8.11    | 100.00        | 0.21±0.09     | Used        |
| Butenylcarnitine          | 22.2    | 46.25         | 0.02 ± 0.01   | Excluded    | 17.88   | 9.43          | 0.03±0.01     | Excluded    |
| Hydroxybutyrylcarnitine   | 21.1    | 18.95         | 0.06 ± 0.03   | Excluded    | 18.82   | 50.65         | 0.05±0.03     | Used        |
| Valerylcarnitine          | 10.8    | 98.7          | 0.17 ± 0.11   | Used        | 8.51    | 99.87         | 0.17±0.06     | Used        |
| Tiglylcarnitine           | 22.9    | 1.8           | 0.05 ± 0.01   | Excluded    | 15.64   | 0.13          | 0.05±0.01     | Excluded    |
| Glutaconylcarnitine       | 40      | 24.83         | 0.01 ± 0.01   | Excluded    | 23.07   | 13.57         | 0.02±0        | Excluded    |
| Glutaryl carnitine        | 29.4    | 61.36         | 0.02 ± 0.01   | Excluded    | 21.23   | 47.29         | 0.02±0.01     | Excluded    |
| Methylglutaryl carnitine  | 28      | 2.48          | 0.03 ± 0.01   | Excluded    | 14.42   | 4.52          | 0.05±0.05     | Excluded    |
| Hydroxyvalerylcarnitine   | 26.9    | 19.69         | 0.03 ± 0.01   | Excluded    | 25.08   | 18.48         | 0.04±0.01     | Excluded    |
| Hexanoylcarnitine         | 21.8    | 65.33         | 0.09 ± 0.08   | Used        | 21.65   | 43.28         | 0.07±0.04     | Excluded    |
| Hexenoylcarnitine         | 30.7    | 5.2           | 0.02 ± 0.01   | Excluded    | 23.52   | 5.81          | 0.02±0.01     | Excluded    |
| Pimelylcarnitine          | 18.4    | 70.53         | 0.05 ± 0.02   | Used        | 13.73   | 63.70         | 0.03±0.01     | Used        |
| Octanoylcarnitine         | 13.2    | 60.62         | 0.27 ± 0.24   | Used        | 9.06    | 46.90         | 0.14±0.09     | Excluded    |
| Nonaylcarnitine           | 23.6    | 97.28         | 0.05 ± 0.02   | Used        | 21.26   | 94.70         | 0.05±0.02     | Excluded    |
| Decanoylcarnitine         | 11.7    | 99.07         | 0.39 ± 0.3    | Used        | 8.52    | 89.15         | 0.23±0.13     | Used        |
| Decenoylcarnitine         | 11.2    | 74.8          | 0.18 ± 0.08   | Used        | 7.91    | 46.12         | 0.13±0.05     | Excluded    |
| Decadienylcarnitine       | 16      | 94.86         | 0.04 ± 0.01   | Used        | 10.32   | 88.37         | 0.04±0.02     | Used        |
| Dodecanoylcarnitine       | 12.2    | 96.41         | 0.16 ± 0.07   | Used        | 9.85    | 58.14         | 0.1±0.04      | Used        |
| Dodecenoylcarnitine       | 15.2    | 26.75         | 0.17 ± 0.06   | Excluded    | 10.08   | 38.24         | 0.09±0.04     | Excluded    |
| Dodecanedioylcarnitine    | 12.3    | 0             | 0.07 ± 0.01   | Excluded    | 10.25   | 0.00          | 0.07±0.01     | Excluded    |
| Tetradecanoylcarnitine    | 15.8    | 96.66         | 0.06 ± 0.02   | Used        | 12.59   | 85.40         | 0.05±0.01     | Used        |
| Tetradecenoylcarnitine    | 11.4    | 99.63         | 0.15 ± 0.05   | Used        | 10.95   | 100.00        | 0.09±0.03     | Used        |

|                                 |      |       |                    |          |       |        |               |          |
|---------------------------------|------|-------|--------------------|----------|-------|--------|---------------|----------|
| Hydroxytetradecenoylcarnitine   | 28.9 | 74.92 | 0.02 ± 0.01        | Excluded | 20.01 | 60.08  | 0.01±0        | Excluded |
| Tetradecadienylcarnitine        | 18.3 | 98.33 | 0.04 ± 0.02        | Used     | 12.29 | 95.87  | 0.02±0.01     | Used     |
| Hydroxytetradecadienylcarnitine | 35.1 | 47    | 0.01 ± 0           | Excluded | 16.17 | 35.01  | 0.01±0.01     | Excluded |
| Hexadecanoylcarnitine           | 11.3 | 99.63 | 0.14 ± 0.03        | Used     | 10.48 | 100.00 | 0.13±0.03     | Used     |
| Hexadecenoylcarnitine           | 18.1 | 77.83 | 0.04 ± 0.01        | Used     | 13.83 | 61.37  | 0.03±0.01     | Used     |
| Hydroxyhexadecenoylcarnitine    | 26.5 | 26.01 | 0.01 ± 0           | Excluded | 24.69 | 45.09  | 0.01±0        | Excluded |
| Hexadecadienylcarnitine         | 34   | 87.49 | 0.01 ± 0           | Excluded | 16.35 | 72.35  | 0.01±0        | Used     |
| Hydroxyhexadecadienylcarnitine  | 30.1 | 5.76  | 0.01 ± 0           | Excluded | 21.38 | 0.13   | 0.01±0        | Excluded |
| Hydroxyhexadecanoylcarnitine    | 33   | 16.28 | 0.01 ± 0           | Excluded | 22.03 | 51.03  | 0.01±0        | Excluded |
| Octadecanoylcarnitine           | 15.7 | 99.63 | 0.06 ± 0.01        | Used     | 15.04 | 100.00 | 0.06±0.02     | Used     |
| Octadecenoylcarnitine           | 9.7  | 99.57 | 0.15 ± 0.04        | Used     | 8.76  | 100.00 | 0.17±0.05     | Used     |
| Hydroxyoctadecenoylcarnitine    | 44.6 | 7.37  | 0.01 ± 0           | Excluded | 24.11 | 2.07   | 0.01±0        | Excluded |
| Octadecadienylcarnitine         | 10.5 | 99.57 | 0.05 ± 0.02        | Used     | 8.32  | 100.00 | 0.07±0.02     | Used     |
| Alanine                         | 13.7 | 99.5  | 419.93 ±<br>100.25 | Used     | 5.97  | 100.00 | 474.5±97.72   | Used     |
| Arginine                        | 13.2 | 99.26 | 127.38 ± 27.01     | Used     | 12.26 | 100.00 | 135.03±30.41  | Used     |
| Asparagine                      | 11.1 | 99.57 | 46.08 ± 8.47       | Used     | 22.48 | 100.00 | 56.13±12.52   | Excluded |
| Aspartate                       | 12.2 | 99.44 | 30.05 ± 9.93       | Used     | 18.39 | 100.00 | 51.14±12.92   | Used     |
| Citrulline                      | 12.7 | 99.44 | 35.11 ± 9.94       | Used     | 11.20 | 100.00 | 36.92±11.83   | Used     |
| Glutamine                       | 12.8 | 99.57 | 579.79 ±<br>118.55 | Used     | 15.13 | 100.00 | 612.01±115.41 | Used     |
| Glutamate                       | 15.8 | 99.57 | 81.53 ± 35.4       | Used     | 10.53 | 100.00 | 170.97±75.34  | Used     |
| Glycine                         | 13.2 | 99.5  | 263.02 ± 74.35     | Used     | 16.76 | 100.00 | 347.87±81.28  | Used     |
| Histidine                       | 12.9 | 99.38 | 82.39 ± 15.13      | Used     | 12.47 | 100.00 | 98.59±17.24   | Used     |
| Isoleucine                      | 13.9 | 99.63 | 72.65 ± 19.67      | Used     | 12.03 | 100.00 | 98.52±32.16   | Used     |
| Leucine                         | 12.9 | 98.58 | 160.26 ± 43.19     | Used     | 10.41 | 100.00 | 204.78±54.9   | Used     |
| Lysine                          | 15.5 | 99.69 | 166.36 ± 37.05     | Used     | 14.05 | 100.00 | 176.72±34     | Used     |
| Methionine                      | 13.5 | 99.69 | 23.94 ± 6.85       | Used     | 13.62 | 100.00 | 26.33±7.76    | Used     |
| Ornithine                       | 14.9 | 99.63 | 59.34 ± 15.12      | Used     | 15.48 | 100.00 | 94.12±21.6    | Used     |
| Phenylalanine                   | 12.2 | 99.57 | 77.51 ± 17.62      | Used     | 12.11 | 100.00 | 109.69±18.79  | Used     |
| Proline                         | 11.8 | 99.63 | 195.17 ± 60.16     | Used     | 9.23  | 99.87  | 250.07±63.9   | Used     |
| Serine                          | 13.6 | 99.44 | 126.75 ± 28.92     | Used     | 13.60 | 100.00 | 161.02±29.55  | Used     |
| Threonine                       | 18.3 | 99.13 | 120.31 ± 31.71     | Used     | 5.55  | 100.00 | 123.6±28.35   | Used     |
| Tryptophan                      | 12.9 | 99.63 | 60.23 ± 12.64      | Used     | 11.50 | 100.00 | 68.65±14.31   | Used     |

|                                    |      |       |                |          |       |        |              |          |
|------------------------------------|------|-------|----------------|----------|-------|--------|--------------|----------|
| Tryosine                           | 14.7 | 99.57 | 72.51 ± 20.2   | Used     | 11.62 | 100.00 | 82.62±21.04  | Used     |
| Valine                             | 13.5 | 99.63 | 228.02 ± 51.89 | Used     | 12.00 | 100.00 | 243.31±50.16 | Used     |
| Acetylornithine                    | 20.8 | 79.07 | 0.75 ± 0.46    | Used     | 37.51 | 96.38  | 1.35±1.08    | Excluded |
| Asymmetric dimethylarginine        | 17.4 | 66.5  | 0.57 ± 0.38    | Used     | 26.42 | 100.00 | 0.49±0.13    | Excluded |
| Symmetric dimethylarginine         | 32.4 | 97.34 | 0.77 ± 0.26    | Excluded | 41.52 | 99.22  | 0.56±0.28    | Excluded |
| Total dimethylarginine             | 20.3 | 99.2  | 1.22 ± 0.25    | Used     | 25.49 | 89.92  | 0.71±0.34    | Excluded |
| alpha-Aminoadipic acid             | 32   | 97.34 | 0.67 ± 0.29    | Excluded | 26.89 | 95.87  | 1.03±0.67    | Excluded |
| Carnosine                          | 89.8 | 4.02  | 0.13 ± 0.06    | Excluded | NA    | 0.78   | 0.07±0.1     | Excluded |
| Creatinine                         | 14.7 | 99.38 | 76.07 ± 24.21  | Used     | 5.79  | 100.00 | 80.44±44.11  | Used     |
| Histamine                          | 43.5 | 89.97 | 0.39 ± 0.17    | Excluded | 77.23 | 53.62  | 0.15±0.16    | Excluded |
| Kynurenine                         | 11.3 | 97.28 | 2.93 ± 0.76    | Used     | 21.59 | 99.87  | 2.67±0.91    | Excluded |
| Methioninesulfoxide                | 20.9 | 96.66 | 0.76 ± 0.27    | Used     | 20.55 | 99.22  | 1.22±0.6     | Excluded |
| Nitrotyrosine                      | 58.4 | 7.55  | 0.66 ± 0.32    | Excluded | NA    | 0.39   | 0.35±0.37    | Excluded |
| Hydroxyproline                     | NA   | 2.11  | 5.34 ± 5.15    | Excluded | 165.2 | 2.07   | 1.67±6.16    | Excluded |
|                                    |      |       |                |          | 9     |        |              |          |
| Phenylethylamine                   | NA   | 0.56  | 0.09 ± 0.01    | Excluded | 20.14 | 0.52   | 0.02±0.04    | Excluded |
| Putrescine                         | 53.2 | 93.75 | 0.15 ± 0.05    | Excluded | 56.69 | 69.38  | 0.06±0.26    | Excluded |
| Sarcosine                          | 28.7 | 4.4   | 93.9 ± 223.85  | Excluded | 83.02 | 99.61  | 11.52±14.13  | Excluded |
| Serotonin                          | 38   | 99.32 | 0.69 ± 0.36    | Excluded | 131.4 | 99.22  | 0.57±0.29    | Excluded |
|                                    |      |       |                |          | 0     |        |              |          |
| Spermidine                         | 24.1 | 98.51 | 0.27 ± 0.07    | Used     | 19.46 | 74.03  | 0.23±0.27    | Used     |
| Spermine                           | 8.5  | 9.29  | 0.28 ± 0.13    | Excluded | 19.74 | 63.82  | 0.28±0.3     | Used     |
| Taurine                            | 13.7 | 96.9  | 93.65 ± 24.37  | Used     | 11.42 | 100.00 | 141.64±22.76 | Used     |
| DOPA                               | 19.5 | 44.58 | 0.49 ± 0.58    | Excluded | 47.12 | 20.67  | 0.2±0.11     | Excluded |
| Dopamine                           | NA   | 0.06  | 0.61 ± NA      | Excluded | 77.04 | 1.42   | 0.11±2.12    | Excluded |
| lysoPhosphatidylcholine acyl C14:0 | 6.8  | 0     | 6.28 ± 0.8     | Excluded | 5.45  | 42.38  | 5.82±1.53    | Excluded |
| lysoPhosphatidylcholine acyl C16:0 | 6.9  | 99.81 | 122.71 ± 26.13 | Used     | 6.75  | 100.00 | 233.73±55.43 | Used     |
| lysoPhosphatidylcholine acyl C16:1 | 7    | 99.69 | 3.71 ± 1.25    | Used     | 7.59  | 100.00 | 6.73±2.16    | Used     |
| lysoPhosphatidylcholine acyl C17:0 | 7.3  | 99.63 | 2.08 ± 0.67    | Used     | 7.54  | 100.00 | 4.58±1.67    | Used     |
| lysoPhosphatidylcholine acyl       | 7.2  | 99.81 | 32.73 ± 8.11   | Used     | 8.01  | 100.00 | 64.98±18.47  | Used     |

|                                    |      |       |                |          |       |        |              |          |  |
|------------------------------------|------|-------|----------------|----------|-------|--------|--------------|----------|--|
| C18:0                              |      |       |                |          |       |        |              |          |  |
| lysoPhosphatidylcholine acyl C18:1 | 6.8  | 99.75 | 21.5 ± 6.28    | Used     | 7.65  | 100.00 | 35.79±9.82   | Used     |  |
| lysoPhosphatidylcholine acyl C18:2 | 6.9  | 99.75 | 28.09 ± 8.99   | Used     | 7.18  | 100.00 | 46.06±15.11  | Used     |  |
| lysoPhosphatidylcholine acyl C20:3 | 8.8  | 99.63 | 2.29 ± 0.68    | Used     | 7.41  | 100.00 | 3.63±1.11    | Used     |  |
| lysoPhosphatidylcholine acyl C20:4 | 7.3  | 99.69 | 6.2 ± 1.88     | Used     | 7.32  | 100.00 | 10.38±3.03   | Used     |  |
| lysoPhosphatidylcholine acyl C24:0 | 32   | 23.22 | 0.21 ± 0.07    | Excluded | 23.98 | 64.47  | 0.32±0.11    | Excluded |  |
| lysoPhosphatidylcholine acyl C26:0 | 44.4 | 43.72 | 0.3 ± 0.16     | Excluded | 45.37 | 98.06  | 0.55±0.31    | Excluded |  |
| lysoPhosphatidylcholine acyl C26:1 | 9.5  | 0     | 1.68 ± 0.17    | Excluded | 39.74 | 99.87  | 0.25±0.12    | Excluded |  |
| lysoPhosphatidylcholine acyl C28:0 | 37   | 23.47 | 0.33 ± 0.12    | Excluded | 34.67 | 95.35  | 0.55±0.23    | Excluded |  |
| lysoPhosphatidylcholine acyl C28:1 | 35.5 | 98.64 | 0.47 ± 0.16    | Excluded | 29.45 | 100.00 | 0.69±0.23    | Excluded |  |
| Phosphatidylcholine diacyl C24:0   | 45.9 | 69.35 | 0.09 ± 0.05    | Excluded | 39.09 | 96.51  | 0.16±0.08    | Excluded |  |
| Phosphatidylcholine diacyl C26:0   | 27.2 | 5.63  | 0.74 ± 0.26    | Excluded | 27.32 | 29.46  | 1.16±0.41    | Excluded |  |
| Phosphatidylcholine diacyl C28:1   | 9.5  | 99.63 | 3.58 ± 0.84    | Used     | 7.65  | 100.00 | 3.22±0.82    | Used     |  |
| Phosphatidylcholine diacyl C30:0   | 9.4  | 99.63 | 5.85 ± 1.71    | Used     | 7.28  | 100.00 | 4.59±1.43    | Used     |  |
| Phosphatidylcholine diacyl C30:2   | 89.9 | 31.33 | 0.03 ± 0.07    | Excluded | 51.75 | 89.28  | 0.12±0.09    | Excluded |  |
| Phosphatidylcholine diacyl C32:0   | 8.4  | 99.81 | 14.86 ± 2.85   | Used     | 5.91  | 100.00 | 14.16±3.08   | Used     |  |
| Phosphatidylcholine diacyl C32:1   | 9.2  | 99.81 | 20.81 ± 10.63  | Used     | 7.95  | 100.00 | 15.37±10.01  | Used     |  |
| Phosphatidylcholine diacyl C32:2   | 12.3 | 99.81 | 4.31 ± 1.66    | Used     | 8.64  | 100.00 | 4.42±1.65    | Used     |  |
| Phosphatidylcholine diacyl C32:3   | 9.2  | 99.75 | 0.54 ± 0.14    | Used     | 9.25  | 100.00 | 0.6±0.18     | Used     |  |
| Phosphatidylcholine diacyl C34:1   | 7.1  | 99.88 | 222.04 ± 46.61 | Used     | 5.78  | 100.00 | 205.3±53.16  | Used     |  |
| Phosphatidylcholine diacyl C34:2   | 7    | 99.88 | 364.87 ± 50.66 | Used     | 5.86  | 100.00 | 351.39±63.18 | Used     |  |
| Phosphatidylcholine diacyl C34:3   | 6.3  | 99.88 | 18.18 ± 5.25   | Used     | 6.51  | 100.00 | 16.73±4.97   | Used     |  |
| Phosphatidylcholine diacyl C34:4   | 6.8  | 99.81 | 2.18 ± 0.77    | Used     | 7.43  | 100.00 | 2.24±0.76    | Used     |  |
| Phosphatidylcholine diacyl C36:0   | 11.6 | 99.63 | 2.98 ± 0.75    | Used     | 9.15  | 100.00 | 2.63±0.72    | Used     |  |
| Phosphatidylcholine diacyl C36:1   | 6.9  | 99.88 | 53.54 ± 14.16  | Used     | 5.58  | 100.00 | 55.79±14.67  | Used     |  |

|                                      |      |       |                |          |       |        |              |          |
|--------------------------------------|------|-------|----------------|----------|-------|--------|--------------|----------|
| Phosphatidylcholine diacyl C36:2     | 6.6  | 99.88 | 255.06 ± 43.56 | Used     | 5.25  | 100.00 | 241.28±44.22 | Used     |
| Phosphatidylcholine diacyl C36:3     | 6.5  | 99.88 | 151.97 ± 29.94 | Used     | 5.97  | 100.00 | 155.15±31.97 | Used     |
| Phosphatidylcholine diacyl C36:4     | 6.3  | 99.94 | 208.67 ± 44.62 | Used     | 5.86  | 100.00 | 201.24±44.34 | Used     |
| Phosphatidylcholine diacyl C36:5     | 6.7  | 99.81 | 30.78 ± 15.23  | Used     | 6.11  | 100.00 | 29.18±13.97  | Used     |
| Phosphatidylcholine diacyl C36:6     | 9.5  | 99.75 | 1.11 ± 0.43    | Used     | 7.54  | 100.00 | 1.33±0.51    | Used     |
| Phosphatidylcholine diacyl C38:0     | 8.8  | 99.63 | 3.35 ± 0.86    | Used     | 6.57  | 100.00 | 3.84±0.92    | Used     |
| Phosphatidylcholine diacyl C38:1     | 27   | 99.75 | 1.38 ± 0.43    | Excluded | 17.47 | 100.00 | 1.58±0.42    | Used     |
| Phosphatidylcholine diacyl C38:3     | 6.9  | 99.88 | 58.03 ± 14.11  | Used     | 5.02  | 100.00 | 54.98±13.85  | Used     |
| Phosphatidylcholine diacyl C38:4     | 5.7  | 99.88 | 119.01 ± 29.37 | Used     | 5.26  | 100.00 | 111.23±26.31 | Used     |
| Phosphatidylcholine diacyl C38:5     | 5.6  | 99.88 | 62.89 ± 15.21  | Used     | 5.54  | 100.00 | 56.45±13.65  | Used     |
| Phosphatidylcholine diacyl C38:6     | 6.9  | 100   | 89.9 ± 26.07   | Used     | 5.85  | 100.00 | 92.7±24.75   | Used     |
| Phosphatidylcholine diacyl C40:1     | 11.7 | 14.24 | 0.42 ± 0.09    | Excluded | 9.39  | 11.24  | 0.5±0.11     | Excluded |
| Phosphatidylcholine diacyl C40:2     | 14.9 | 99.63 | 0.37 ± 0.11    | Used     | 10.52 | 100.00 | 0.48±0.14    | Used     |
| Phosphatidylcholine diacyl C40:3     | 13.9 | 99.75 | 0.69 ± 0.16    | Used     | 7.60  | 100.00 | 0.82±0.21    | Used     |
| Phosphatidylcholine diacyl C40:4     | 6.8  | 99.81 | 4.15 ± 1.22    | Used     | 5.58  | 100.00 | 4.2±1.2      | Used     |
| Phosphatidylcholine diacyl C40:5     | 6.5  | 99.75 | 12.75 ± 3.6    | Used     | 5.23  | 100.00 | 13.43±4.04   | Used     |
| Phosphatidylcholine diacyl C40:6     | 6.1  | 99.63 | 32.47 ± 10.04  | Used     | 5.48  | 100.00 | 34.36±10.66  | Used     |
| Phosphatidylcholine diacyl C42:0     | 9.2  | 99.88 | 0.55 ± 0.15    | Used     | 8.30  | 100.00 | 0.52±0.15    | Used     |
| Phosphatidylcholine diacyl C42:1     | 12   | 99.69 | 0.27 ± 0.07    | Used     | 9.76  | 100.00 | 0.26±0.07    | Used     |
| Phosphatidylcholine diacyl C42:2     | 13.5 | 99.69 | 0.2 ± 0.05     | Used     | 9.13  | 100.00 | 0.24±0.06    | Used     |
| Phosphatidylcholine diacyl C42:4     | 11   | 99.81 | 0.21 ± 0.04    | Used     | 10.46 | 100.00 | 0.17±0.04    | Used     |
| Phosphatidylcholine diacyl C42:5     | 11.3 | 99.69 | 0.44 ± 0.13    | Used     | 8.32  | 100.00 | 0.51±0.15    | Used     |
| Phosphatidylcholine diacyl C42:6     | 10.7 | 95.42 | 0.6 ± 0.14     | Used     | 8.39  | 69.51  | 0.72±0.17    | Used     |
| Phosphatidylcholine acyl-alkyl C30:0 | 19.7 | 99.57 | 0.45 ± 0.13    | Used     | 14.01 | 97.93  | 0.41±0.12    | Used     |
| Phosphatidylcholine acyl-alkyl C30:1 | 77.9 | 82.35 | 0.13 ± 0.11    | Excluded | 53.44 | 99.74  | 0.23±0.11    | Excluded |
| Phosphatidylcholine acyl-alkyl C30:2 | 25.2 | 99.57 | 0.13 ± 0.04    | Excluded | 16.46 | 95.87  | 0.17±0.04    | Used     |
| Phosphatidylcholine acyl-alkyl C32:1 | 9.3  | 99.81 | 2.79 ± 0.56    | Used     | 6.82  | 100.00 | 2.7±0.57     | Used     |
| Phosphatidylcholine acyl-alkyl C32:2 | 12.2 | 99.63 | 0.71 ± 0.16    | Used     | 9.66  | 100.00 | 0.78±0.18    | Used     |
| Phosphatidylcholine acyl-alkyl       | 9.6  | 99.81 | 1.67 ± 0.43    | Used     | 6.84  | 100.00 | 1.85±0.49    | Used     |

|                                |      |       |              |      |       |        |            |          |  |
|--------------------------------|------|-------|--------------|------|-------|--------|------------|----------|--|
| C34:0                          |      |       |              |      |       |        |            |          |  |
| Phosphatidylcholine acyl-alkyl | 7.4  | 99.81 | 10.4 ± 2.19  | Used | 6.29  | 100.00 | 9±2.07     | Used     |  |
| C34:1                          |      |       |              |      |       |        |            |          |  |
| Phosphatidylcholine acyl-alkyl | 7.2  | 99.88 | 11.96 ± 2.96 | Used | 6.33  | 100.00 | 11.07±2.69 | Used     |  |
| C34:2                          |      |       |              |      |       |        |            |          |  |
| Phosphatidylcholine acyl-alkyl | 6.9  | 99.88 | 7.51 ± 2.12  | Used | 6.22  | 100.00 | 8.01±2.32  | Used     |  |
| C34:3                          |      |       |              |      |       |        |            |          |  |
| Phosphatidylcholine acyl-alkyl | 22.7 | 99.63 | 0.93 ± 0.28  | Used | 12.83 | 100.00 | 1.08±0.27  | Used     |  |
| C36:0                          |      |       |              |      |       |        |            |          |  |
| Phosphatidylcholine acyl-alkyl | 7.9  | 99.75 | 8.79 ± 2.05  | Used | 6.25  | 100.00 | 8.2±1.99   | Used     |  |
| C36:1                          |      |       |              |      |       |        |            |          |  |
| Phosphatidylcholine acyl-alkyl | 7    | 99.88 | 15.06 ± 3.84 | Used | 5.84  | 100.00 | 15.84±4.33 | Used     |  |
| C36:2                          |      |       |              |      |       |        |            |          |  |
| Phosphatidylcholine acyl-alkyl | 7.1  | 99.88 | 7.91 ± 1.85  | Used | 6.37  | 100.00 | 8.54±1.84  | Used     |  |
| C36:3                          |      |       |              |      |       |        |            |          |  |
| Phosphatidylcholine acyl-alkyl | 6.3  | 99.88 | 19.99 ± 4.78 | Used | 6.33  | 100.00 | 17.87±4.09 | Used     |  |
| C36:4                          |      |       |              |      |       |        |            |          |  |
| Phosphatidylcholine acyl-alkyl | 6.1  | 99.81 | 12.96 ± 3.22 | Used | 6.28  | 100.00 | 13.01±3.29 | Used     |  |
| C36:5                          |      |       |              |      |       |        |            |          |  |
| Phosphatidylcholine acyl-alkyl | 8.1  | 99.63 | 2.22 ± 0.66  | Used | 6.18  | 100.00 | 2.76±0.78  | Used     |  |
| C38:0                          |      |       |              |      |       |        |            |          |  |
| Phosphatidylcholine acyl-alkyl | 14.7 | 99.5  | 0.62 ± 0.26  | Used | 11.96 | 34.75  | 0.09±0.17  | Excluded |  |
| C38:1                          |      |       |              |      |       |        |            |          |  |
| Phosphatidylcholine acyl-alkyl | 11.7 | 99.75 | 2.1 ± 0.48   | Used | 7.05  | 100.00 | 2.48±0.57  | Used     |  |
| C38:2                          |      |       |              |      |       |        |            |          |  |
| Phosphatidylcholine acyl-alkyl | 7    | 99.94 | 4.25 ± 0.98  | Used | 6.04  | 100.00 | 5.1±1.2    | Used     |  |
| C38:3                          |      |       |              |      |       |        |            |          |  |
| Phosphatidylcholine acyl-alkyl | 6.1  | 100   | 15.36 ± 3.11 | Used | 5.73  | 100.00 | 14.36±2.77 | Used     |  |
| C38:4                          |      |       |              |      |       |        |            |          |  |
| Phosphatidylcholine acyl-alkyl | 5.9  | 100   | 19.25 ± 3.86 | Used | 5.76  | 100.00 | 19.64±3.74 | Used     |  |
| C38:5                          |      |       |              |      |       |        |            |          |  |
| Phosphatidylcholine acyl-alkyl | 6.5  | 99.88 | 8.7 ± 2.05   | Used | 5.93  | 100.00 | 8.57±1.91  | Used     |  |
| C38:6                          |      |       |              |      |       |        |            |          |  |
| Phosphatidylcholine acyl-alkyl | 11.1 | 99.63 | 1.58 ± 0.37  | Used | 9.42  | 100.00 | 1.83±0.41  | Used     |  |



|                                |      |       |              |          |       |        |            |          |  |
|--------------------------------|------|-------|--------------|----------|-------|--------|------------|----------|--|
| C40:1                          |      |       |              |          |       |        |            |          |  |
| Phosphatidylcholine acyl-alkyl | 8.3  | 99.88 | 2.12 ± 0.49  | Used     | 6.20  | 100.00 | 2.17±0.53  | Used     |  |
| C40:2                          |      |       |              |          |       |        |            |          |  |
| Phosphatidylcholine acyl-alkyl | 9    | 99.94 | 1.18 ± 0.24  | Used     | 6.29  | 100.00 | 1.18±0.32  | Used     |  |
| C40:3                          |      |       |              |          |       |        |            |          |  |
| Phosphatidylcholine acyl-alkyl | 8.7  | 99.63 | 2.68 ± 0.51  | Used     | 6.57  | 100.00 | 2.83±0.56  | Used     |  |
| C40:4                          |      |       |              |          |       |        |            |          |  |
| Phosphatidylcholine acyl-alkyl | 6.5  | 99.88 | 3.66 ± 0.69  | Used     | 5.72  | 100.00 | 4.4±0.88   | Used     |  |
| C40:5                          |      |       |              |          |       |        |            |          |  |
| Phosphatidylcholine acyl-alkyl | 6.9  | 99.94 | 5.42 ± 1.3   | Used     | 5.62  | 100.00 | 5.7±1.35   | Used     |  |
| C40:6                          |      |       |              |          |       |        |            |          |  |
| Phosphatidylcholine acyl-alkyl | 13.8 | 36.35 | 0.52 ± 0.1   | Excluded | 8.46  | 15.89  | 0.69±0.12  | Excluded |  |
| C42:0                          |      |       |              |          |       |        |            |          |  |
| Phosphatidylcholine acyl-alkyl | 16   | 99.57 | 0.38 ± 0.09  | Used     | 13.43 | 100.00 | 0.48±0.11  | Used     |  |
| C42:1                          |      |       |              |          |       |        |            |          |  |
| Phosphatidylcholine acyl-alkyl | 11.5 | 99.69 | 0.63 ± 0.14  | Used     | 8.13  | 100.00 | 0.72±0.16  | Used     |  |
| C42:2                          |      |       |              |          |       |        |            |          |  |
| Phosphatidylcholine acyl-alkyl | 9.8  | 99.88 | 0.84 ± 0.19  | Used     | 8.46  | 100.00 | 0.86±0.18  | Used     |  |
| C42:3                          |      |       |              |          |       |        |            |          |  |
| Phosphatidylcholine acyl-alkyl | 7.8  | 99.63 | 0.95 ± 0.22  | Used     | 6.21  | 100.00 | 0.96±0.22  | Used     |  |
| C42:4                          |      |       |              |          |       |        |            |          |  |
| Phosphatidylcholine acyl-alkyl | 7.4  | 99.57 | 2.19 ± 0.46  | Used     | 5.55  | 100.00 | 2.26±0.49  | Used     |  |
| C42:5                          |      |       |              |          |       |        |            |          |  |
| Phosphatidylcholine acyl-alkyl | 24.3 | 99.69 | 0.13 ± 0.04  | Used     | 14.93 | 100.00 | 0.14±0.03  | Used     |  |
| C44:3                          |      |       |              |          |       |        |            |          |  |
| Phosphatidylcholine acyl-alkyl | 12.1 | 99.69 | 0.38 ± 0.1   | Used     | 9.21  | 100.00 | 0.36±0.08  | Used     |  |
| C44:4                          |      |       |              |          |       |        |            |          |  |
| Phosphatidylcholine acyl-alkyl | 7.4  | 99.69 | 1.73 ± 0.46  | Used     | 6.18  | 100.00 | 1.46±0.38  | Used     |  |
| C44:5                          |      |       |              |          |       |        |            |          |  |
| Phosphatidylcholine acyl-alkyl | 7.8  | 99.63 | 1.25 ± 0.33  | Used     | 6.16  | 100.00 | 1.02±0.28  | Used     |  |
| C44:6                          |      |       |              |          |       |        |            |          |  |
| Hydroxysphingomyeline C14:1    | 11   | 99.63 | 9.43 ± 2.53  | Used     | 7.18  | 100.00 | 9.88±2.94  | Used     |  |
| Hydroxysphingomyeline C16:1    | 11   | 100   | 5.15 ± 1.35  | Used     | 8.16  | 100.00 | 4.85±1.39  | Used     |  |
| Hydroxysphingomyeline C22:1    | 11.2 | 99.88 | 20.18 ± 4.56 | Used     | 8.63  | 100.00 | 18.97±4.74 | Used     |  |

|                             |      |       |                      |          |       |        |                    |          |
|-----------------------------|------|-------|----------------------|----------|-------|--------|--------------------|----------|
| Hydroxysphingomyeline C22:2 | 11.2 | 99.88 | 16.33 ± 4.09         | Used     | 8.94  | 100.00 | 14.95±4.16         | Used     |
| Hydroxysphingomyeline C24:1 | 15.1 | 99.75 | 1.99 ± 0.49          | Used     | 10.86 | 100.00 | 1.76±0.48          | Used     |
| Sphingomyeline C16:0        | 10.6 | 99.88 | 150.28 ± 24.31       | Used     | 7.28  | 100.00 | 146.17±24.55       | Used     |
| Sphingomyeline C16:1        | 9.9  | 99.88 | 23.81 ± 4.67         | Used     | 7.33  | 100.00 | 23.75±5.19         | Used     |
| Sphingomyeline C18:0        | 9.8  | 99.81 | 33.18 ± 7.02         | Used     | 7.76  | 100.00 | 31.52±7.17         | Used     |
| Sphingomyeline C18:1        | 9.4  | 99.88 | 16.7 ± 4.09          | Used     | 7.30  | 100.00 | 15.29±4.12         | Used     |
| Sphingomyeline C20:2        | 16.2 | 99.81 | 0.66 ± 0.23          | Used     | 9.59  | 100.00 | 1.21±0.62          | Used     |
| Sphingomyeline C22:3        | NA   | 0.37  | 0 ± 0.01             | Excluded | 41.07 | 78.94  | 0.39±0.41          | Excluded |
| Sphingomyeline C24:0        | 11.9 | 99.75 | 30.26 ± 5.82         | Used     | 8.81  | 100.00 | 28.77±5.78         | Used     |
| Sphingomyeline C24:1        | 12.1 | 99.88 | 76.6 ± 14.93         | Used     | 8.79  | 100.00 | 66.12±13.01        | Used     |
| Sphingomyeline C26:0        | 31.8 | 99.81 | 0.3 ± 0.09           | Excluded | 32.47 | 100.00 | 0.21±0.07          | Excluded |
| Sphingomyeline C26:1        | 21.2 | 99.75 | 0.65 ± 0.2           | Used     | 17.62 | 100.00 | 0.57±0.17          | Used     |
| Hexose                      | 5.2  | 99.81 | 5368.96 ±<br>1010.34 | Used     | 5.53  | 100.00 | 5255.8±1967.3<br>3 | Used     |

**Table S2. Metabolites associated with MI in KORA S4**

| Metabolites | Basic model            |                      | Multivariable model    |                      | Multivariable model +<br>hsCRP |         |
|-------------|------------------------|----------------------|------------------------|----------------------|--------------------------------|---------|
|             | (MI: 67, non-MI: 1275) |                      | (MI: 67, non-MI: 1263) |                      | (MI: 67, non-MI: 1250)         |         |
|             | HR (95% CI)            | P value              | HR (95% CI)            | P value              | HR (95% CI)                    | P value |
| Arginine    | 1.40(1.10,1.78)        | 0.006                | 1.35(1.06,1.72)        | 0.016                | 1.32(1.04,1.69)                | 0.024   |
| Tryptophan  | 0.79(0.62,1.00)        | 0.050                | 0.72(0.57,0.92)        | 0.01                 | 0.77(0.60,0.99)                | 0.044   |
| LPC 16:0    | 0.65(0.51,0.83)        | 0.001                | 0.66(0.51,0.86)        | 0.002                | 0.69(0.53,0.91)                | 0.008   |
| LPC 17:0    | 0.65(0.52,0.82)        | 2.5×10 <sup>-4</sup> | 0.69(0.53,0.89)        | 0.005                | 0.71(0.55,0.93)                | 0.01    |
| LPC 18:1    | 0.65(0.52,0.82)        | 0.001                | 0.71(0.54,0.94)        | 0.017                | 0.75(0.56,1.00)                | 0.05    |
| LPC 18:2    | 0.71(0.56,0.91)        | 5.3×10 <sup>-5</sup> | 0.65(0.49,0.87)        | 0.004                | 0.70(0.52,0.94)                | 0.017   |
| PC aa C28:1 | 0.66(0.51,0.84)        | 0.012                | 0.66(0.49,0.91)        | 0.01                 | 0.66(0.48,0.90)                | 0.01    |
| PC aa C32:2 | 0.60(0.46,0.77)        | 2.1×10 <sup>-4</sup> | 0.64(0.50,0.81)        | 2.2×10 <sup>-4</sup> | 0.67(0.52,0.86)                | 0.002   |
| PC aa C34:2 | 0.72(0.56,0.93)        | 0.036                | 0.62(0.47,0.83)        | 0.001                | 0.64(0.48,0.85)                | 0.002   |
| PC aa C34:3 | 0.66(0.53,0.82)        | 0.007                | 0.69(0.52,0.91)        | 0.009                | 0.72(0.54,0.96)                | 0.026   |
| PC aa C36:2 | 0.72(0.57,0.92)        | 0.028                | 0.7(0.52,0.94)         | 0.017                | 0.73(0.54,0.97)                | 0.033   |
| PC aa C36:3 | 0.72(0.56,0.92)        | 0.045                | 0.68(0.51,0.92)        | 0.011                | 0.69(0.51,0.94)                | 0.016   |
| PC ae C36:2 | 0.79(0.62,1.00)        | 0.030                | 0.67(0.49,0.91)        | 0.011                | 0.69(0.51,0.94)                | 0.019   |
| PC ae C38:0 | 0.78(0.61,0.99)        | 0.002                | 0.7(0.52,0.95)         | 0.022                | 0.73(0.54,0.99)                | 0.041   |
| PC ae C38:2 | 0.75(0.58,0.97)        | 0.009                | 0.74(0.55,0.98)        | 0.038                | 0.74(0.56,0.99)                | 0.043   |
| PC ae C40:1 | 0.67(0.52,0.87)        | 0.007                | 0.67(0.50,0.91)        | 0.009                | 0.71(0.52,0.97)                | 0.029   |

The basic model was adjusted for age and sex. The multivariable model was additionally adjusted for BMI, diabetes, systolic blood pressure, smoking status, (current smoker, former smoker and never smoker), alcohol consumption ( $\geq 20$  g/day for women;  $\geq 40$  g/day for men), total cholesterol, and HDL-C. The final column shows the multivariable model with an additional adjustment for hsCRP. Values are provided as estimated HR (95% CI) for each SD increase of the log-transformed metabolite concentration. Abbreviations: HR, hazard ratio; CI: confidence interval.

**Table S3. Sensitivity analysis of the three metabolite biomarkers association with MI**

|                                                                          | Arginine          | LPC 17:0             | LPC 18:2          |
|--------------------------------------------------------------------------|-------------------|----------------------|-------------------|
| <b>KORA S4</b>                                                           |                   |                      |                   |
| <b>Adjust for statin use (67 incident MI / 1275 non-MI)</b>              |                   |                      |                   |
| HR (95% CI)                                                              | 1.32(1.04,1.69)   | 0.71 (0.55, 0.93)    | 0.70 (0.52, 0.94) |
| P value                                                                  | 0.02              | 0.01                 | 0.02              |
| <b>Include non-fasting samples (86 incident MI / 1417 non-MI)</b>        |                   |                      |                   |
| HR (95% CI)                                                              | 1.31(1.06,1.62)   | 0.79 (0.63, 0.99)    | 0.75 (0.60, 0.94) |
| P value                                                                  | 0.014             | 0.04                 | 0.011             |
| <b>Exclude participants with diabetes (54 incident MI / 1171 non-MI)</b> |                   |                      |                   |
| HR (95% CI)                                                              | 1.31 (1.02, 1.67) | 0.69 (0.53, 0.90)    | 0.67 (0.49, 0.90) |
| P value                                                                  | 0.03              | 0.006                | 0.008             |
| <b>Exclude statin users ( 64 incident MI / 1161 non-MI)</b>              |                   |                      |                   |
| HR (95% CI)                                                              | 1.30 (1.01, 1.70) | 0.69 (0.52, 0.91)    | 0.70 (0.50,0.97)  |
| P value                                                                  | 0.04              | $9.5 \times 10^{-3}$ | 0.03              |
| <b>KORA S2</b>                                                           |                   |                      |                   |
| <b>Adjust for statin use (112 incident MI / 549 non-MI)</b>              |                   |                      |                   |
| HR(95% CI)                                                               | 1.17(0.97,1.42)   | 0.75 (0.60, 0.95)    | 0.84 (0.68, 1.03) |
| P value                                                                  | 0.10              | 0.01                 | 0.08              |
| <b>Exclude participants with diabetes ( 92 incident MI / 532 non-MI)</b> |                   |                      |                   |
| HR (95% CI)                                                              | 1.13 (0.93,1.38)  | 0.71 (0.56,0.90)     | 0.72 (0.57, 0.90) |
| P value                                                                  | 0.22              | 0.005                | 0.005             |
| <b>Exclude statin users (112 incident MI / 546 non-MI)</b>               |                   |                      |                   |
| HR(95% CI)                                                               | 1.17 (0.98, 1.42) | 0.75 (0.60, 0.95)    | 0.83 (0.68, 1.03) |
| P value                                                                  | 0.08              | 0.015                | 0.09              |

Sensitivity analyses were conducted by including non-fasting samples in KORA S4 and S2, and excluding participants with diabetes and those taking statins. Associations between our novel biomarkers and incident MI were assessed in age, sex and smoking subgroups using Cox regression models with adjustment for age, sex, BMI, alcohol consumption, systolic blood pressure, diabetes status, total cholesterol, HDL cholesterol, and hsCRP. Values in the table are provided as estimated hazard ratio and associated 95% confidence interval for each standard deviation increase of the log-transformed metabolite concentrations. Abbreviations: HR, hazard ratio; hsCRP, high-sensitivity CRP

**Table S4. Spearman correlation amongst metabolite biomarkers and hsCRP for KORA S4 (lower triangle) and KORA S2 (upper triangle)**

|         |          | KORA S2                        |                                 |                                 |                                 | KORA S2 |
|---------|----------|--------------------------------|---------------------------------|---------------------------------|---------------------------------|---------|
|         |          | Arginine                       | LPC 17:0                        | LPC 18:2                        | hsCRP                           |         |
| KORA S4 | Arginine |                                | -0.06 (0.13)                    | -0.01 (0.71)                    | 0.27 ( $1.8 \times 10^{-14}$ )  |         |
|         | LPC 17:0 | 0.04 (0.12)                    |                                 | 0.46 ( $1.5 \times 10^{-40}$ )  | -0.20 ( $4.5 \times 10^{-08}$ ) |         |
|         | LPC 18:2 | 0.06 (0.03)                    | 0.49 ( $3.1 \times 10^{-80}$ )  |                                 | -0.32 ( $6.0 \times 10^{-20}$ ) |         |
|         | hsCRP    | 0.11 ( $2.8 \times 10^{-05}$ ) | -0.32 ( $3.3 \times 10^{-33}$ ) | -0.37 ( $7.4 \times 10^{-45}$ ) |                                 |         |
|         |          | KORA S4                        |                                 |                                 |                                 |         |

The Spearman correlation and associated P value (in parentheses) for arginine, LPC 17:0, LPC 18:2, and high sensitivity C-reactive protein (hsCRP) for KORA S4 (lower triangle) and KORA S2 (upper triangle).

**Table S5. Linear association between the metabolite biomarkers and hsCRP**

| Metabolite | KORA S4              |                       | KORA S2              |                       | AGES-REFINE          |         | Meta-analysis       |                       |
|------------|----------------------|-----------------------|----------------------|-----------------------|----------------------|---------|---------------------|-----------------------|
|            | $\beta$ (95% CI)     | P Value               | $\beta$ (95% CI)     | P Value               | $\beta$ (95% CI)     | P Value | $\beta$ (95% CI)    | P Value               |
| Arginine   | 0.07 (0.01, 0.12)    | 0.02                  | 0.24 (0.16,0.32)     | $2.8 \times 10^{-9}$  | 0.27 (0.08, 0.46)    | 0.006   | 0.13 (0.09, 0.18)   | $5.3 \times 10^{-9}$  |
| LPC 17:0   | -0.27 (-0.33, -0.21) | $8.8 \times 10^{-19}$ | -0.19 (-0.28, -0.11) | $2.2 \times 10^{-5}$  | -0.30 (-0.51, -0.09) | 0.005   | -0.25(-0.30, -0.20) | $1.4 \times 10^{-24}$ |
| LPC 18:2   | -0.31 (-0.37, -0.25) | $1.5 \times 10^{-24}$ | -0.28 (-0.37, -0.20) | $2.1 \times 10^{-11}$ | -0.20 (-0.40, 0.00)  | 0.05    | -0.30 (-0.35,-0.25) | $3.3 \times 10^{-36}$ |

The  $\beta$  estimates (95% CI) for the linear regression of metabolites on hsCRP. HsCRP, high sensitivity C-reactive protein, CI, confidence interval.

**Table S6. Change in the association between hsCRP and incident MI after adding the three metabolite biomarkers**

|                            | KORA S4         |                       | KORA S2         |                        | AGES-REFINE     |         | Meta-analysis   |                       |
|----------------------------|-----------------|-----------------------|-----------------|------------------------|-----------------|---------|-----------------|-----------------------|
|                            | HR (95% CI)     | P value               | HR(95% CI)      | P value                | HR(95% CI)      | P value | HR(95% CI)      | P value               |
| <b>Without metabolites</b> |                 |                       |                 |                        |                 |         |                 |                       |
| Age                        | 1.27(0.98,1.65) | 0.08                  | 2.64(1.99,3.5)  | 1.23x10 <sup>-11</sup> | 1.55(0.39,6.11) | 0.53    | 1.79(1.01,3.17) | 0.05                  |
| Sex*                       | 0.28(0.14,0.55) | 2.61x10 <sup>-4</sup> | 0.33(0.19,0.56) | 3.82x10 <sup>-5</sup>  | 0.91(0.47,1.79) | 0.79    | 0.43(0.21,0.88) | 0.02                  |
| BMI                        | 1.23(0.95,1.59) | 0.12                  | 0.88(0.7,1.12)  | 0.31                   | 0.80(0.55,1.16) | 0.24    | 0.97(0.75,1.25) | 0.81                  |
| Diabetes                   | 1.8(0.92,3.54)  | 0.09                  | 3.52(2.02,6.13) | 9.21x10 <sup>-6</sup>  | 1.35(0.58,3.16) | 0.49    | 2.18(1.23,3.87) | 0.008                 |
| Systolic BP                | 1.25(0.97,1.6)  | 0.08                  | 1.37(1.12,1.66) | 1.69x10 <sup>-3</sup>  | 1.02(0.44,2.40) | 0.96    | 1.31(1.13,1.52) | 4.57x10 <sup>-4</sup> |
| Current smoker †           | 0.87(0.48,1.59) | 0.66                  | 1.59(0.95,2.66) | 0.08                   | 1.44(0.73,2.86) | 0.29    | 1.27(0.87,1.86) | 0.21                  |
| Former smoker †            | 1.54(0.73,3.24) | 0.25                  | 2.27(1.33,3.9)  | 2.81x10 <sup>-3</sup>  | 1.14(0.84,1.53) | 0.4     | 1.52(0.96,2.38) | 0.07                  |
| Alcohol intake ‡           | 0.61(0.3,1.22)  | 0.16                  | 0.79(0.5,1.27)  | 0.33                   | –               | –       | 0.73(0.50,1.08) | 0.11                  |
| Total cholesterol          | 1.01(0.77,1.31) | 0.97                  | 1.52(1.27,1.82) | 4.71x10 <sup>-6</sup>  | 1.41(1.06,1.88) | 0.02    | 1.31(1.02,1.68) | 0.04                  |
| HDL-C                      | 1.01(0.74,1.38) | 0.95                  | 0.73(0.57,0.93) | 0.01                   | 0.79(0.55,1.14) | 0.21    | 0.82(0.67,1.02) | 0.07                  |
| HsCRP                      | 1.19(1.04,1.35) | 0.01                  | 1.16(1.02,1.32) | 0.02                   | 1.41(1.06,1.89) | 0.02    | 1.19(1.09,1.30) | 6.58x10 <sup>-5</sup> |
| <b>With metabolites</b>    |                 |                       |                 |                        |                 |         |                 |                       |
| Arginine                   | 1.69(1.26,2.27) | 4.40x10 <sup>-4</sup> | 1.08(0.87,1.32) | 0.49                   | 1.10(0.75,1.63) | 0.63    | 1.26(0.94,1.69) | 0.13                  |
| LPC 17:0                   | 0.66(0.50,0.87) | 3.20x10 <sup>-3</sup> | 0.71(0.54,0.94) | 0.02                   | 1.03(0.68,1.55) | 0.89    | 0.78(0.65,0.94) | 0.008                 |
| LPC 18:2                   | 0.92(0.65,1.29) | 0.62                  | 0.88(0.68,1.13) | 0.3                    | 0.69(0.45,1.06) | 0.09    | 0.85(0.71,1.02) | 0.08                  |
| Age                        | 1.24(0.94,1.63) | 0.13                  | 2.67(2.00,3.57) | 3.00x10 <sup>-11</sup> | 1.66(0.38,7.34) | 0.51    | 1.79(0.98,3.28) | 0.06                  |
| Sex*                       | 0.26(0.12,0.54) | 3.70x10 <sup>-4</sup> | 0.36(0.21,0.64) | 4.70x10 <sup>-4</sup>  | 0.89(0.42,1.88) | 0.76    | 0.43(0.22,0.86) | 0.02                  |
| BMI                        | 1.19(0.90,1.58) | 0.22                  | 0.79(0.62,1.02) | 0.07                   | 0.76(0.50,1.14) | 0.18    | 0.91(0.68,1.21) | 0.5                   |
| Diabetes                   | 1.85(0.93,3.66) | 0.08                  | 4.91(2.74,8.79) | 8.40x10 <sup>-8</sup>  | 1.28(0.51,3.22) | 0.6     | 2.39(1.07,5.32) | 0.03                  |
| Systolic BP                | 1.19(0.92,1.54) | 0.18                  | 1.39(1.14,1.70) | 9.40x10 <sup>-4</sup>  | 1.17(0.47,2.92) | 0.74    | 1.31(1.12,1.53) | 5.57x10 <sup>-4</sup> |
| Current smoker †           | 0.80(0.44,1.46) | 0.47                  | 1.70(0.99,2.91) | 0.05                   | 1.52(0.76,3.04) | 0.24    | 1.28(0.79,2.06) | 0.31                  |
| Former smoker †            | 1.22(0.57,2.62) | 0.61                  | 2.18(1.23,3.84) | 0.01                   | 1.15(0.84,1.56) | 0.4     | 1.41(0.93,2.14) | 0.11                  |
| Alcohol intake ‡           | 0.60(0.29,1.24) | 0.17                  | 0.55(0.33,0.92) | 0.02                   | –               | –       | 0.57(0.37,0.87) | 0.01                  |
| Total cholesterol          | 1.12(0.85,1.47) | 0.42                  | 1.54(1.27,1.86) | 5.40x10 <sup>-6</sup>  | 1.48(1.07,2.05) | 0.02    | 1.38(1.13,1.69) | 0.002                 |
| HDL-C                      | 0.97(0.71,1.34) | 0.87                  | 0.79(0.61,1.02) | 0.07                   | 0.79(0.54,1.15) | 0.22    | 0.84(0.71,1.01) | 0.06                  |
| HsCRP                      | 1.05(0.80,1.38) | 0.74                  | 1.10(0.94,1.27) | 0.23                   | 1.27(0.91,1.76) | 0.16    | 1.11(0.98,1.25) | 0.1                   |

Estimates of hsCRP and the confounders from the multivariable Cox regression model. \* women compared with men; † compared with never smokers; ‡ ≥20 g/day for women; ≥40 g/day for men. Abbreviations: HR, hazard ratio; CI, confidence interval.
